# Supplementary material for: Statistical Analysis of Alpha Power Exponential Parameters Using Progressive First-Failure Censoring with Applications
Source: MDPI journal article supplement (doi:10.3390/axioms11100553), 2022-10-13
Supplement: s1 [file s1]

## Supplementary Materials

# Statistical Analysis of Alpha Power Exponential Parameters Using Progressive First-Failure Censoring With Applications

Mazen Nassar<sup>1,2</sup>, Refah Alotaibi<sup>3</sup> and Ahmed Elshahhat<sup>4\*</sup>

<sup>1</sup>Department of Statistics, Faculty of Science, King Abdulaziz University, Jeddah 21589, Saudi Arabia

<sup>2</sup>Department of Statistics, Faculty of Commerce, Zagazig University, Egypt

<sup>3</sup>Department of Mathematical Sciences, College of Science, Princess Nourah bint Abdulrahman  
University, P.O. Box 84428, Riyadh 11671, Saudi Arabia

<sup>4</sup>Faculty of Technology and Development, Zagazig University, Zagazig 44519, Egypt

---

\*Email: aelshahhat@ftd.zu.edu.eg; dr\_ahmed\_elshahhat@yahoo.com

Table S1: The average estimates ( $1^{st}$  row), RMSEs ( $2^{nd}$  row) and MRABs ( $3^{rd}$  row) of  $\alpha$  when  $k = 2$ .

| $k$                 | $(n, m)$ | Scheme | MLE   | SEL   |       | LL    |       |       |       |
|---------------------|----------|--------|-------|-------|-------|-------|-------|-------|-------|
| Prior $\rightarrow$ |          |        |       | 1     | 2     | 1     |       | 2     |       |
| $\eta \rightarrow$  |          |        |       |       |       | -2    | +2    | -2    | +2    |
| 2                   | (30,12)  | S1     | 1.169 | 0.978 | 0.601 | 0.993 | 0.961 | 0.604 | 0.599 |
|                     |          |        | 1.153 | 0.496 | 0.215 | 0.494 | 0.463 | 0.206 | 0.193 |
|                     |          |        | 1.044 | 0.957 | 0.398 | 0.987 | 0.923 | 0.411 | 0.385 |
| S2                  |          | 1.005  | 0.980 | 0.605 | 0.995 | 0.963 | 0.607 | 0.602 |       |
|                     |          | 1.447  | 0.497 | 0.222 | 0.495 | 0.465 | 0.213 | 0.198 |       |
|                     |          | 1.182  | 0.960 | 0.410 | 0.989 | 0.926 | 0.425 | 0.396 |       |
| S3                  |          | 1.322  | 0.972 | 0.607 | 0.986 | 0.957 | 0.610 | 0.604 |       |
|                     |          | 1.911  | 0.488 | 0.220 | 0.487 | 0.458 | 0.211 | 0.197 |       |
|                     |          | 1.130  | 0.944 | 0.407 | 0.972 | 0.913 | 0.421 | 0.394 |       |
| (30,24)             |          | S1     | 1.068 | 0.832 | 0.589 | 0.851 | 0.814 | 0.598 | 0.580 |
|                     |          |        | 0.600 | 0.360 | 0.131 | 0.352 | 0.315 | 0.105 | 0.099 |
|                     |          |        | 0.811 | 0.664 | 0.210 | 0.701 | 0.628 | 0.208 | 0.198 |
|                     | S2       | 1.004  | 0.828 | 0.589 | 0.846 | 0.810 | 0.598 | 0.581 |       |
|                     |          | 0.583  | 0.355 | 0.130 | 0.347 | 0.311 | 0.108 | 0.102 |       |
|                     |          | 0.815  | 0.655 | 0.209 | 0.692 | 0.620 | 0.215 | 0.204 |       |
|                     | S3       | 1.139  | 0.822 | 0.594 | 0.839 | 0.805 | 0.603 | 0.586 |       |
|                     |          | 0.945  | 0.349 | 0.134 | 0.340 | 0.306 | 0.110 | 0.105 |       |
|                     |          | 0.900  | 0.643 | 0.214 | 0.678 | 0.609 | 0.219 | 0.209 |       |
|                     | (80,32)  | S1     | 0.669 | 0.757 | 0.640 | 0.774 | 0.740 | 0.647 | 0.634 |
|                     |          |        | 0.429 | 0.289 | 0.163 | 0.275 | 0.241 | 0.148 | 0.134 |
|                     |          |        | 0.842 | 0.534 | 0.283 | 0.547 | 0.480 | 0.294 | 0.267 |
| S2                  |          | 0.678  | 0.772 | 0.649 | 0.790 | 0.754 | 0.656 | 0.642 |       |
|                     |          | 0.429  | 0.304 | 0.171 | 0.291 | 0.264 | 0.156 | 0.142 |       |
|                     |          | 0.841  | 0.544 | 0.300 | 0.580 | 0.528 | 0.312 | 0.284 |       |
| S3                  |          | 0.935  | 0.796 | 0.670 | 0.817 | 0.776 | 0.678 | 0.662 |       |
|                     |          | 0.839  | 0.330 | 0.192 | 0.318 | 0.277 | 0.178 | 0.163 |       |
|                     |          | 1.016  | 0.593 | 0.342 | 0.633 | 0.552 | 0.356 | 0.325 |       |
| (80,64)             |          | S1     | 0.410 | 0.767 | 0.699 | 0.771 | 0.763 | 0.706 | 0.693 |
|                     |          |        | 0.417 | 0.275 | 0.114 | 0.271 | 0.263 | 0.099 | 0.081 |
|                     |          |        | 0.790 | 0.514 | 0.203 | 0.542 | 0.526 | 0.196 | 0.160 |
|                     | S2       | 0.415  | 0.768 | 0.705 | 0.772 | 0.764 | 0.712 | 0.698 |       |
|                     |          | 0.415  | 0.276 | 0.118 | 0.272 | 0.255 | 0.099 | 0.082 |       |
|                     |          | 0.790  | 0.536 | 0.200 | 0.544 | 0.508 | 0.197 | 0.162 |       |
|                     | S3       | 0.541  | 0.770 | 0.704 | 0.774 | 0.766 | 0.711 | 0.697 |       |
|                     |          | 0.421  | 0.278 | 0.119 | 0.274 | 0.266 | 0.104 | 0.086 |       |
|                     |          | 0.806  | 0.540 | 0.206 | 0.549 | 0.532 | 0.206 | 0.171 |       |

Table S2: The average estimates ( $1^{st}$  row), RMSEs ( $2^{nd}$  row) and MRABs ( $3^{rd}$  row) of  $\alpha$  when  $k = 5$ .

| $k$<br>Prior $\rightarrow$<br>$\eta \rightarrow$ | $(n, m)$ | Scheme | MLE   | SEL   |       | LL    |       |       |       |
|--------------------------------------------------|----------|--------|-------|-------|-------|-------|-------|-------|-------|
|                                                  |          |        |       | 1     | 2     | 1     |       | 2     |       |
|                                                  |          |        |       |       |       | -2    | +2    | -2    | +2    |
| 5                                                | (30,12)  | S1     | 1.296 | 1.082 | 0.707 | 1.104 | 1.056 | 0.713 | 0.702 |
|                                                  |          |        | 1.540 | 0.603 | 0.312 | 0.605 | 0.558 | 0.307 | 0.294 |
|                                                  |          |        | 1.346 | 1.163 | 0.600 | 1.208 | 1.112 | 0.614 | 0.587 |
|                                                  |          | S2     | 1.488 | 1.102 | 0.731 | 1.125 | 1.076 | 0.736 | 0.725 |
|                                                  |          |        | 1.877 | 0.623 | 0.329 | 0.626 | 0.578 | 0.325 | 0.312 |
|                                                  |          |        | 1.528 | 1.205 | 0.636 | 1.250 | 1.152 | 0.650 | 0.623 |
|                                                  |          | S3     | 1.941 | 1.112 | 0.738 | 1.135 | 1.084 | 0.744 | 0.732 |
|                                                  |          |        | 1.972 | 0.633 | 0.333 | 0.636 | 0.586 | 0.330 | 0.316 |
|                                                  |          |        | 1.853 | 1.223 | 0.645 | 1.270 | 1.169 | 0.659 | 0.631 |
|                                                  | (30,24)  | S1     | 0.584 | 0.985 | 0.710 | 1.007 | 0.962 | 0.720 | 0.699 |
|                                                  |          |        | 0.633 | 0.508 | 0.233 | 0.507 | 0.464 | 0.220 | 0.203 |
|                                                  |          |        | 0.865 | 0.969 | 0.419 | 1.013 | 0.925 | 0.440 | 0.404 |
|                                                  |          | S2     | 0.613 | 0.983 | 0.712 | 1.004 | 0.961 | 0.722 | 0.702 |
|                                                  |          |        | 0.649 | 0.438 | 0.243 | 0.505 | 0.462 | 0.237 | 0.226 |
|                                                  |          |        | 0.881 | 0.864 | 0.461 | 1.008 | 0.922 | 0.473 | 0.450 |
|                                                  |          | S3     | 1.371 | 0.975 | 0.720 | 0.996 | 0.955 | 0.730 | 0.710 |
|                                                  |          |        | 1.618 | 0.497 | 0.250 | 0.496 | 0.456 | 0.244 | 0.233 |
|                                                  |          |        | 1.725 | 0.951 | 0.475 | 0.991 | 0.910 | 0.487 | 0.464 |
|                                                  | (80,32)  | S1     | 0.716 | 0.853 | 0.738 | 0.872 | 0.834 | 0.746 | 0.730 |
|                                                  |          |        | 0.432 | 0.422 | 0.254 | 0.421 | 0.409 | 0.246 | 0.231 |
|                                                  |          |        | 0.831 | 0.830 | 0.477 | 0.841 | 0.819 | 0.491 | 0.461 |
|                                                  |          | S2     | 0.952 | 0.863 | 0.756 | 0.881 | 0.845 | 0.764 | 0.749 |
|                                                  |          |        | 0.442 | 0.506 | 0.271 | 0.438 | 0.427 | 0.264 | 0.249 |
|                                                  |          |        | 0.829 | 0.965 | 0.513 | 0.875 | 0.853 | 0.528 | 0.497 |
|                                                  |          | S3     | 1.020 | 0.894 | 0.781 | 0.912 | 0.875 | 0.789 | 0.772 |
|                                                  |          |        | 1.183 | 0.436 | 0.295 | 0.435 | 0.423 | 0.289 | 0.273 |
|                                                  |          |        | 1.137 | 0.859 | 0.561 | 0.870 | 0.847 | 0.577 | 0.545 |
|                                                  | (80,64)  | S1     | 0.477 | 0.915 | 0.800 | 0.920 | 0.909 | 0.807 | 0.793 |
|                                                  |          |        | 0.430 | 0.380 | 0.221 | 0.373 | 0.335 | 0.214 | 0.200 |
|                                                  |          |        | 0.789 | 0.706 | 0.414 | 0.744 | 0.668 | 0.425 | 0.399 |
|                                                  |          | S2     | 0.488 | 0.932 | 0.818 | 0.938 | 0.926 | 0.825 | 0.811 |
|                                                  |          |        | 0.430 | 0.388 | 0.235 | 0.381 | 0.346 | 0.223 | 0.203 |
|                                                  |          |        | 0.791 | 0.726 | 0.424 | 0.761 | 0.690 | 0.444 | 0.404 |
|                                                  |          | S3     | 0.757 | 0.929 | 0.822 | 0.935 | 0.923 | 0.829 | 0.816 |
|                                                  |          |        | 0.432 | 0.418 | 0.243 | 0.413 | 0.376 | 0.231 | 0.210 |
|                                                  |          |        | 0.799 | 0.788 | 0.440 | 0.825 | 0.750 | 0.460 | 0.419 |

Table S3: The average estimates ( $1^{st}$  row), RMSEs ( $2^{nd}$  row) and MRABs ( $3^{rd}$  row) of  $\delta$  when  $k = 2$ .

| $k$<br>Prior $\rightarrow$<br>$\eta \rightarrow$ | $(n, m)$ | Scheme | MLE   | SEL   |       | LL    |       |       |       |
|--------------------------------------------------|----------|--------|-------|-------|-------|-------|-------|-------|-------|
|                                                  |          |        |       | 1     | 2     | 1     |       | 2     |       |
|                                                  |          |        |       |       |       | -2    | +2    | -2    | +2    |
| 2                                                | (30,12)  | S1     | 0.804 | 0.703 | 0.870 | 0.724 | 0.681 | 0.883 | 0.856 |
|                                                  |          |        | 0.541 | 0.388 | 0.376 | 0.365 | 0.385 | 0.353 | 0.372 |
|                                                  |          |        | 0.498 | 0.375 | 0.363 | 0.365 | 0.385 | 0.352 | 0.372 |
|                                                  |          | S2     | 0.924 | 0.716 | 0.867 | 0.737 | 0.696 | 0.880 | 0.853 |
|                                                  |          |        | 0.687 | 0.376 | 0.366 | 0.351 | 0.373 | 0.344 | 0.362 |
|                                                  |          |        | 0.534 | 0.361 | 0.353 | 0.351 | 0.373 | 0.343 | 0.361 |
|                                                  |          | S3     | 1.540 | 0.726 | 0.870 | 0.746 | 0.705 | 0.883 | 0.856 |
|                                                  |          |        | 1.368 | 0.363 | 0.353 | 0.342 | 0.359 | 0.323 | 0.347 |
|                                                  |          |        | 1.021 | 0.351 | 0.335 | 0.342 | 0.359 | 0.323 | 0.347 |
|                                                  | (30,24)  | S1     | 0.651 | 0.694 | 0.697 | 0.712 | 0.676 | 0.717 | 0.681 |
|                                                  |          |        | 0.535 | 0.334 | 0.332 | 0.288 | 0.319 | 0.284 | 0.320 |
|                                                  |          |        | 0.456 | 0.306 | 0.303 | 0.288 | 0.319 | 0.283 | 0.319 |
|                                                  |          | S2     | 0.674 | 0.696 | 0.697 | 0.714 | 0.679 | 0.716 | 0.680 |
|                                                  |          |        | 0.534 | 0.332 | 0.331 | 0.286 | 0.322 | 0.285 | 0.320 |
|                                                  |          |        | 0.493 | 0.304 | 0.303 | 0.286 | 0.321 | 0.284 | 0.320 |
|                                                  |          | S3     | 0.746 | 0.699 | 0.700 | 0.716 | 0.682 | 0.719 | 0.684 |
|                                                  |          |        | 0.540 | 0.329 | 0.325 | 0.284 | 0.318 | 0.282 | 0.317 |
|                                                  |          |        | 0.485 | 0.301 | 0.300 | 0.284 | 0.318 | 0.281 | 0.316 |
|                                                  | (80,32)  | S1     | 0.584 | 0.625 | 0.637 | 0.635 | 0.615 | 0.648 | 0.628 |
|                                                  |          |        | 0.504 | 0.332 | 0.176 | 0.276 | 0.324 | 0.157 | 0.162 |
|                                                  |          |        | 0.451 | 0.299 | 0.159 | 0.276 | 0.324 | 0.157 | 0.161 |
|                                                  |          | S2     | 0.627 | 0.639 | 0.647 | 0.649 | 0.627 | 0.657 | 0.639 |
|                                                  |          |        | 0.510 | 0.318 | 0.178 | 0.263 | 0.304 | 0.155 | 0.159 |
|                                                  |          |        | 0.452 | 0.285 | 0.156 | 0.263 | 0.304 | 0.154 | 0.158 |
|                                                  |          | S3     | 0.995 | 0.665 | 0.649 | 0.677 | 0.653 | 0.658 | 0.641 |
|                                                  |          |        | 0.736 | 0.310 | 0.175 | 0.254 | 0.295 | 0.153 | 0.157 |
|                                                  |          |        | 0.616 | 0.276 | 0.155 | 0.254 | 0.295 | 0.153 | 0.157 |
|                                                  | (80,64)  | S1     | 0.506 | 0.816 | 0.841 | 0.831 | 0.799 | 0.843 | 0.839 |
|                                                  |          |        | 0.488 | 0.225 | 0.166 | 0.170 | 0.202 | 0.118 | 0.145 |
|                                                  |          |        | 0.426 | 0.187 | 0.135 | 0.169 | 0.201 | 0.117 | 0.144 |
|                                                  |          | S2     | 0.513 | 0.821 | 0.844 | 0.836 | 0.806 | 0.846 | 0.842 |
|                                                  |          |        | 0.495 | 0.218 | 0.163 | 0.165 | 0.195 | 0.121 | 0.148 |
|                                                  |          |        | 0.431 | 0.182 | 0.138 | 0.164 | 0.194 | 0.120 | 0.147 |
|                                                  |          | S3     | 0.542 | 0.825 | 0.845 | 0.840 | 0.810 | 0.847 | 0.843 |
|                                                  |          |        | 0.526 | 0.215 | 0.162 | 0.161 | 0.191 | 0.118 | 0.145 |
|                                                  |          |        | 0.448 | 0.178 | 0.135 | 0.160 | 0.190 | 0.117 | 0.144 |

Table S4: The average estimates ( $1^{st}$  row), RMSEs ( $2^{nd}$  row) and MRABs ( $3^{rd}$  row) of  $\delta$  when  $k = 5$ .

| $k$<br>Prior $\rightarrow$<br>$\eta \rightarrow$ | $(n, m)$ | Scheme | MLE   | SEL   |       | LL    |       |       |       |
|--------------------------------------------------|----------|--------|-------|-------|-------|-------|-------|-------|-------|
|                                                  |          |        |       | 1     | 2     | 1     |       | 2     |       |
|                                                  |          |        |       |       |       | -2    | +2    | -2    | +2    |
| 5                                                | (30,12)  | S1     | 0.408 | 0.416 | 0.593 | 0.449 | 0.388 | 0.639 | 0.549 |
|                                                  |          |        | 0.807 | 0.732 | 0.694 | 0.719 | 0.733 | 0.653 | 0.696 |
|                                                  |          |        | 0.798 | 0.727 | 0.678 | 0.719 | 0.733 | 0.651 | 0.696 |
|                                                  |          | S2     | 0.484 | 0.428 | 0.608 | 0.461 | 0.401 | 0.653 | 0.564 |
|                                                  |          |        | 0.802 | 0.721 | 0.685 | 0.709 | 0.722 | 0.645 | 0.687 |
|                                                  |          |        | 0.793 | 0.716 | 0.669 | 0.708 | 0.722 | 0.644 | 0.686 |
|                                                  |          | S3     | 0.995 | 0.439 | 0.618 | 0.471 | 0.411 | 0.661 | 0.575 |
|                                                  |          |        | 0.923 | 0.703 | 0.671 | 0.691 | 0.704 | 0.633 | 0.672 |
|                                                  |          |        | 0.760 | 0.699 | 0.656 | 0.690 | 0.704 | 0.632 | 0.672 |
|                                                  | (30,24)  | S1     | 0.301 | 0.331 | 0.389 | 0.348 | 0.318 | 0.434 | 0.357 |
|                                                  |          |        | 0.730 | 0.681 | 0.642 | 0.653 | 0.682 | 0.568 | 0.644 |
|                                                  |          |        | 0.701 | 0.669 | 0.611 | 0.652 | 0.682 | 0.566 | 0.643 |
|                                                  |          | S2     | 0.317 | 0.335 | 0.392 | 0.352 | 0.323 | 0.435 | 0.359 |
|                                                  |          |        | 0.722 | 0.676 | 0.640 | 0.649 | 0.678 | 0.567 | 0.641 |
|                                                  |          |        | 0.689 | 0.665 | 0.608 | 0.648 | 0.677 | 0.565 | 0.641 |
|                                                  |          | S3     | 0.384 | 0.339 | 0.395 | 0.357 | 0.326 | 0.437 | 0.363 |
|                                                  |          |        | 0.687 | 0.672 | 0.636 | 0.644 | 0.674 | 0.565 | 0.638 |
|                                                  |          |        | 0.636 | 0.621 | 0.605 | 0.623 | 0.614 | 0.563 | 0.607 |
|                                                  | (80,32)  | S1     | 0.257 | 0.273 | 0.322 | 0.281 | 0.267 | 0.349 | 0.304 |
|                                                  |          |        | 0.761 | 0.651 | 0.621 | 0.632 | 0.652 | 0.598 | 0.622 |
|                                                  |          |        | 0.743 | 0.643 | 0.601 | 0.631 | 0.652 | 0.597 | 0.621 |
|                                                  |          | S2     | 0.284 | 0.284 | 0.331 | 0.292 | 0.278 | 0.356 | 0.314 |
|                                                  |          |        | 0.746 | 0.645 | 0.612 | 0.625 | 0.645 | 0.590 | 0.613 |
|                                                  |          |        | 0.719 | 0.636 | 0.602 | 0.624 | 0.645 | 0.589 | 0.612 |
|                                                  |          | S3     | 0.579 | 0.301 | 0.345 | 0.309 | 0.296 | 0.368 | 0.328 |
|                                                  |          |        | 0.779 | 0.641 | 0.608 | 0.621 | 0.641 | 0.586 | 0.608 |
|                                                  |          |        | 0.752 | 0.632 | 0.598 | 0.620 | 0.641 | 0.585 | 0.608 |
|                                                  | (80,64)  | S1     | 0.202 | 0.357 | 0.389 | 0.369 | 0.348 | 0.403 | 0.379 |
|                                                  |          |        | 0.676 | 0.610 | 0.461 | 0.552 | 0.612 | 0.363 | 0.452 |
|                                                  |          |        | 0.625 | 0.584 | 0.407 | 0.551 | 0.612 | 0.361 | 0.451 |
|                                                  |          | S2     | 0.207 | 0.364 | 0.398 | 0.376 | 0.355 | 0.411 | 0.388 |
|                                                  |          |        | 0.683 | 0.598 | 0.448 | 0.540 | 0.599 | 0.348 | 0.437 |
|                                                  |          |        | 0.618 | 0.572 | 0.392 | 0.539 | 0.599 | 0.347 | 0.436 |
|                                                  |          | S3     | 0.241 | 0.368 | 0.402 | 0.380 | 0.359 | 0.415 | 0.392 |
|                                                  |          |        | 0.670 | 0.588 | 0.438 | 0.530 | 0.589 | 0.340 | 0.426 |
|                                                  |          |        | 0.590 | 0.562 | 0.382 | 0.529 | 0.589 | 0.339 | 0.425 |

Table S5: The average estimates ( $1^{st}$  row), RMSEs ( $2^{nd}$  row) and MRABs ( $3^{rd}$  row) of  $R(t)$  when  $k = 2$ .

| $k$<br>Prior $\rightarrow$<br>$\eta \rightarrow$ | $(n, m)$ | Scheme | MLE   | SEL   |       | LL    |       |       |       |
|--------------------------------------------------|----------|--------|-------|-------|-------|-------|-------|-------|-------|
|                                                  |          |        |       | 1     | 2     | 1     |       | 2     |       |
|                                                  |          |        |       |       |       | -2    | +2    | -2    | +2    |
| 2                                                | (30,12)  | S1     | 0.940 | 0.931 | 0.896 | 0.931 | 0.930 | 0.896 | 0.895 |
|                                                  |          |        | 0.072 | 0.061 | 0.054 | 0.059 | 0.059 | 0.052 | 0.051 |
|                                                  |          |        | 0.078 | 0.067 | 0.059 | 0.067 | 0.067 | 0.059 | 0.059 |
|                                                  |          | S2     | 0.937 | 0.929 | 0.896 | 0.930 | 0.929 | 0.896 | 0.896 |
|                                                  |          |        | 0.069 | 0.060 | 0.053 | 0.058 | 0.058 | 0.051 | 0.051 |
|                                                  |          |        | 0.075 | 0.066 | 0.058 | 0.066 | 0.066 | 0.058 | 0.058 |
|                                                  |          | S3     | 0.941 | 0.928 | 0.896 | 0.929 | 0.928 | 0.896 | 0.896 |
|                                                  |          |        | 0.073 | 0.059 | 0.054 | 0.056 | 0.056 | 0.052 | 0.051 |
|                                                  |          |        | 0.079 | 0.064 | 0.059 | 0.064 | 0.064 | 0.059 | 0.059 |
|                                                  | (30,24)  | S1     | 0.939 | 0.927 | 0.914 | 0.927 | 0.926 | 0.914 | 0.913 |
|                                                  |          |        | 0.069 | 0.056 | 0.046 | 0.054 | 0.054 | 0.042 | 0.041 |
|                                                  |          |        | 0.077 | 0.062 | 0.047 | 0.062 | 0.062 | 0.048 | 0.047 |
|                                                  |          | S2     | 0.939 | 0.926 | 0.914 | 0.926 | 0.926 | 0.914 | 0.913 |
|                                                  |          |        | 0.068 | 0.056 | 0.046 | 0.054 | 0.054 | 0.042 | 0.041 |
|                                                  |          |        | 0.072 | 0.062 | 0.048 | 0.062 | 0.061 | 0.048 | 0.047 |
|                                                  |          | S3     | 0.940 | 0.926 | 0.914 | 0.926 | 0.925 | 0.914 | 0.913 |
|                                                  |          |        | 0.070 | 0.057 | 0.046 | 0.054 | 0.053 | 0.042 | 0.041 |
|                                                  |          |        | 0.078 | 0.061 | 0.047 | 0.061 | 0.061 | 0.048 | 0.047 |
|                                                  | (80,32)  | S1     | 0.938 | 0.931 | 0.924 | 0.931 | 0.931 | 0.924 | 0.924 |
|                                                  |          |        | 0.067 | 0.060 | 0.034 | 0.058 | 0.058 | 0.033 | 0.033 |
|                                                  |          |        | 0.075 | 0.064 | 0.037 | 0.066 | 0.066 | 0.038 | 0.037 |
|                                                  |          | S2     | 0.936 | 0.930 | 0.923 | 0.930 | 0.930 | 0.923 | 0.923 |
|                                                  |          |        | 0.065 | 0.059 | 0.034 | 0.057 | 0.056 | 0.033 | 0.032 |
|                                                  |          |        | 0.073 | 0.064 | 0.038 | 0.065 | 0.064 | 0.038 | 0.037 |
|                                                  |          | S3     | 0.938 | 0.928 | 0.924 | 0.929 | 0.928 | 0.924 | 0.924 |
|                                                  |          |        | 0.067 | 0.055 | 0.033 | 0.052 | 0.055 | 0.033 | 0.032 |
|                                                  |          |        | 0.076 | 0.061 | 0.037 | 0.063 | 0.061 | 0.037 | 0.037 |
|                                                  | (80,64)  | S1     | 0.937 | 0.912 | 0.905 | 0.912 | 0.911 | 0.905 | 0.905 |
|                                                  |          |        | 0.066 | 0.042 | 0.028 | 0.040 | 0.039 | 0.024 | 0.023 |
|                                                  |          |        | 0.074 | 0.045 | 0.027 | 0.045 | 0.045 | 0.027 | 0.026 |
|                                                  |          | S2     | 0.937 | 0.911 | 0.905 | 0.911 | 0.911 | 0.905 | 0.905 |
|                                                  |          |        | 0.062 | 0.041 | 0.028 | 0.039 | 0.038 | 0.024 | 0.023 |
|                                                  |          |        | 0.071 | 0.044 | 0.027 | 0.045 | 0.044 | 0.028 | 0.027 |
|                                                  |          | S3     | 0.938 | 0.911 | 0.905 | 0.911 | 0.911 | 0.905 | 0.905 |
|                                                  |          |        | 0.066 | 0.041 | 0.028 | 0.039 | 0.038 | 0.024 | 0.024 |
|                                                  |          |        | 0.075 | 0.044 | 0.027 | 0.044 | 0.044 | 0.027 | 0.027 |

Table S6: The average estimates ( $1^{st}$  row), RMSEs ( $2^{nd}$  row) and MRABs ( $3^{rd}$  row) of  $R(t)$  when  $k = 5$ .

| $k$<br>Prior $\rightarrow$<br>$\eta \rightarrow$ | $(n, m)$ | Scheme | MLE   | SEL   |       | LL    |       |       |       |
|--------------------------------------------------|----------|--------|-------|-------|-------|-------|-------|-------|-------|
|                                                  |          |        |       | 1     | 2     | 1     |       | 2     |       |
|                                                  |          |        |       |       |       | -2    | +2    | -2    | +2    |
| 5                                                | (30,12)  | S1     | 0.976 | 0.960 | 0.932 | 0.960 | 0.959 | 0.932 | 0.931 |
|                                                  |          |        | 0.105 | 0.099 | 0.093 | 0.098 | 0.098 | 0.091 | 0.090 |
|                                                  |          |        | 0.119 | 0.113 | 0.104 | 0.113 | 0.113 | 0.104 | 0.103 |
|                                                  |          | S2     | 0.975 | 0.959 | 0.931 | 0.959 | 0.958 | 0.932 | 0.931 |
|                                                  |          |        | 0.103 | 0.098 | 0.092 | 0.097 | 0.097 | 0.090 | 0.090 |
|                                                  |          |        | 0.118 | 0.112 | 0.103 | 0.112 | 0.111 | 0.103 | 0.103 |
|                                                  |          | S3     | 0.976 | 0.958 | 0.930 | 0.958 | 0.958 | 0.931 | 0.930 |
|                                                  |          |        | 0.104 | 0.097 | 0.091 | 0.096 | 0.096 | 0.089 | 0.089 |
|                                                  |          |        | 0.119 | 0.110 | 0.102 | 0.110 | 0.110 | 0.102 | 0.102 |
|                                                  | (30,24)  | S1     | 0.976 | 0.967 | 0.954 | 0.967 | 0.967 | 0.955 | 0.953 |
|                                                  |          |        | 0.104 | 0.096 | 0.086 | 0.095 | 0.094 | 0.082 | 0.081 |
|                                                  |          |        | 0.118 | 0.108 | 0.094 | 0.108 | 0.108 | 0.094 | 0.093 |
|                                                  |          | S2     | 0.976 | 0.966 | 0.954 | 0.966 | 0.966 | 0.955 | 0.953 |
|                                                  |          |        | 0.102 | 0.095 | 0.086 | 0.094 | 0.094 | 0.082 | 0.081 |
|                                                  |          |        | 0.116 | 0.108 | 0.094 | 0.108 | 0.107 | 0.094 | 0.093 |
|                                                  |          | S3     | 0.976 | 0.966 | 0.954 | 0.966 | 0.966 | 0.954 | 0.953 |
|                                                  |          |        | 0.103 | 0.095 | 0.085 | 0.094 | 0.093 | 0.082 | 0.081 |
|                                                  |          |        | 0.118 | 0.107 | 0.093 | 0.107 | 0.107 | 0.094 | 0.093 |
|                                                  | (80,32)  | S1     | 0.976 | 0.971 | 0.963 | 0.971 | 0.970 | 0.963 | 0.962 |
|                                                  |          |        | 0.103 | 0.092 | 0.086 | 0.091 | 0.091 | 0.085 | 0.085 |
|                                                  |          |        | 0.117 | 0.104 | 0.097 | 0.104 | 0.104 | 0.097 | 0.097 |
|                                                  |          | S2     | 0.974 | 0.970 | 0.962 | 0.970 | 0.970 | 0.963 | 0.962 |
|                                                  |          |        | 0.102 | 0.091 | 0.085 | 0.091 | 0.090 | 0.085 | 0.084 |
|                                                  |          |        | 0.115 | 0.104 | 0.097 | 0.104 | 0.104 | 0.097 | 0.097 |
|                                                  |          | S3     | 0.975 | 0.968 | 0.961 | 0.968 | 0.968 | 0.962 | 0.961 |
|                                                  |          |        | 0.103 | 0.091 | 0.085 | 0.090 | 0.090 | 0.084 | 0.084 |
|                                                  |          |        | 0.118 | 0.103 | 0.096 | 0.103 | 0.103 | 0.097 | 0.096 |
|                                                  | (80,64)  | S1     | 0.975 | 0.963 | 0.957 | 0.963 | 0.963 | 0.957 | 0.957 |
|                                                  |          |        | 0.101 | 0.090 | 0.065 | 0.088 | 0.087 | 0.060 | 0.059 |
|                                                  |          |        | 0.114 | 0.100 | 0.068 | 0.100 | 0.100 | 0.069 | 0.067 |
|                                                  |          | S2     | 0.975 | 0.963 | 0.957 | 0.963 | 0.963 | 0.957 | 0.957 |
|                                                  |          |        | 0.101 | 0.089 | 0.064 | 0.087 | 0.086 | 0.060 | 0.058 |
|                                                  |          |        | 0.112 | 0.099 | 0.067 | 0.100 | 0.099 | 0.068 | 0.067 |
|                                                  |          | S3     | 0.975 | 0.962 | 0.956 | 0.963 | 0.962 | 0.957 | 0.956 |
|                                                  |          |        | 0.102 | 0.088 | 0.063 | 0.086 | 0.085 | 0.059 | 0.058 |
|                                                  |          |        | 0.117 | 0.098 | 0.067 | 0.099 | 0.098 | 0.067 | 0.066 |

Table S7: The average estimates ( $1^{st}$  row), RMSEs ( $2^{nd}$  row) and MRABs ( $3^{rd}$  row) of  $h(t)$  when  $k = 2$ .

| $k$<br>Prior $\rightarrow$<br>$\eta \rightarrow$ | $(n, m)$ | Scheme | MLE   | SEL   |       | LL    |       |       |       |
|--------------------------------------------------|----------|--------|-------|-------|-------|-------|-------|-------|-------|
|                                                  |          |        |       | 1     | 2     | 1     |       | 2     |       |
|                                                  |          |        |       |       |       | -2    | +2    | -2    | +2    |
| 2                                                | (30,12)  | S1     | 0.631 | 0.720 | 1.092 | 0.759 | 0.687 | 1.119 | 1.065 |
|                                                  |          |        | 0.760 | 0.655 | 0.581 | 0.621 | 0.659 | 0.531 | 0.582 |
|                                                  |          |        | 0.536 | 0.470 | 0.415 | 0.461 | 0.490 | 0.393 | 0.432 |
|                                                  |          | S2     | 0.673 | 0.733 | 1.087 | 0.770 | 0.702 | 1.113 | 1.059 |
|                                                  |          |        | 0.729 | 0.634 | 0.573 | 0.613 | 0.636 | 0.524 | 0.573 |
|                                                  |          |        | 0.526 | 0.464 | 0.409 | 0.455 | 0.472 | 0.388 | 0.426 |
|                                                  |          | S3     | 0.675 | 0.745 | 1.088 | 0.781 | 0.713 | 1.114 | 1.061 |
|                                                  |          |        | 0.743 | 0.629 | 0.580 | 0.595 | 0.633 | 0.534 | 0.580 |
|                                                  |          |        | 0.537 | 0.450 | 0.415 | 0.442 | 0.470 | 0.396 | 0.431 |
|                                                  | (30,24)  | S1     | 0.631 | 0.762 | 0.898 | 0.792 | 0.737 | 0.953 | 0.853 |
|                                                  |          |        | 0.738 | 0.608 | 0.502 | 0.556 | 0.644 | 0.396 | 0.494 |
|                                                  |          |        | 0.532 | 0.434 | 0.334 | 0.412 | 0.479 | 0.292 | 0.366 |
|                                                  |          | S2     | 0.640 | 0.766 | 0.897 | 0.795 | 0.741 | 0.950 | 0.853 |
|                                                  |          |        | 0.717 | 0.604 | 0.502 | 0.552 | 0.605 | 0.398 | 0.494 |
|                                                  |          |        | 0.506 | 0.431 | 0.334 | 0.409 | 0.449 | 0.294 | 0.366 |
|                                                  |          | S3     | 0.624 | 0.771 | 0.898 | 0.800 | 0.747 | 0.950 | 0.854 |
|                                                  |          |        | 0.726 | 0.598 | 0.501 | 0.548 | 0.599 | 0.398 | 0.493 |
|                                                  |          |        | 0.510 | 0.427 | 0.334 | 0.406 | 0.445 | 0.294 | 0.365 |
|                                                  | (80,32)  | S1     | 0.641 | 0.713 | 0.788 | 0.725 | 0.702 | 0.817 | 0.765 |
|                                                  |          |        | 0.721 | 0.642 | 0.365 | 0.588 | 0.609 | 0.348 | 0.362 |
|                                                  |          |        | 0.523 | 0.466 | 0.263 | 0.436 | 0.452 | 0.258 | 0.269 |
|                                                  |          | S2     | 0.667 | 0.722 | 0.796 | 0.734 | 0.711 | 0.824 | 0.773 |
|                                                  |          |        | 0.704 | 0.621 | 0.365 | 0.577 | 0.615 | 0.349 | 0.362 |
|                                                  |          |        | 0.517 | 0.456 | 0.264 | 0.428 | 0.459 | 0.259 | 0.269 |
|                                                  |          | S3     | 0.663 | 0.740 | 0.787 | 0.752 | 0.729 | 0.813 | 0.766 |
|                                                  |          |        | 0.713 | 0.615 | 0.362 | 0.567 | 0.617 | 0.347 | 0.360 |
|                                                  |          |        | 0.524 | 0.445 | 0.262 | 0.420 | 0.458 | 0.257 | 0.267 |
|                                                  | (80,64)  | S1     | 0.645 | 0.921 | 0.991 | 0.943 | 0.899 | 0.998 | 0.984 |
|                                                  |          |        | 0.710 | 0.451 | 0.304 | 0.404 | 0.447 | 0.229 | 0.284 |
|                                                  |          |        | 0.521 | 0.316 | 0.189 | 0.299 | 0.332 | 0.169 | 0.209 |
|                                                  |          | S2     | 0.650 | 0.927 | 0.991 | 0.947 | 0.906 | 0.998 | 0.984 |
|                                                  |          |        | 0.693 | 0.444 | 0.309 | 0.400 | 0.441 | 0.234 | 0.289 |
|                                                  |          |        | 0.504 | 0.312 | 0.193 | 0.296 | 0.327 | 0.173 | 0.213 |
|                                                  |          | S3     | 0.641 | 0.930 | 0.993 | 0.951 | 0.909 | 1.000 | 0.987 |
|                                                  |          |        | 0.697 | 0.441 | 0.307 | 0.396 | 0.437 | 0.234 | 0.287 |
|                                                  |          |        | 0.507 | 0.309 | 0.192 | 0.294 | 0.325 | 0.173 | 0.212 |

Table S8: The average estimates ( $1^{st}$  row), RMSEs ( $2^{nd}$  row) and MRABs ( $3^{rd}$  row) of  $h(t)$  when  $k = 5$ .

| $k$<br>Prior $\rightarrow$<br>$\eta \rightarrow$ | $(n, m)$ | Scheme | MLE   | SEL   |       | LL    |       |       |       |
|--------------------------------------------------|----------|--------|-------|-------|-------|-------|-------|-------|-------|
|                                                  |          |        |       | 1     | 2     | 1     |       | 2     |       |
|                                                  |          |        |       |       |       | -2    | +2    | -2    | +2    |
| 5                                                | (30,12)  | S1     | 0.243 | 0.415 | 0.706 | 0.469 | 0.376 | 0.782 | 0.634 |
|                                                  |          |        | 1.107 | 1.053 | 0.988 | 1.032 | 1.057 | 0.917 | 0.997 |
|                                                  |          |        | 0.819 | 0.778 | 0.718 | 0.766 | 0.785 | 0.678 | 0.740 |
|                                                  |          | S2     | 0.261 | 0.422 | 0.713 | 0.475 | 0.385 | 0.786 | 0.643 |
|                                                  |          |        | 1.100 | 1.044 | 0.981 | 1.024 | 1.047 | 0.914 | 0.990 |
|                                                  |          |        | 0.816 | 0.771 | 0.714 | 0.760 | 0.778 | 0.676 | 0.735 |
|                                                  |          | S3     | 0.268 | 0.430 | 0.721 | 0.482 | 0.393 | 0.793 | 0.653 |
|                                                  |          |        | 1.104 | 1.030 | 0.970 | 1.012 | 1.033 | 0.908 | 0.978 |
|                                                  |          |        | 0.818 | 0.761 | 0.707 | 0.751 | 0.767 | 0.672 | 0.727 |
|                                                  | (30,24)  | S1     | 0.244 | 0.339 | 0.472 | 0.368 | 0.321 | 0.558 | 0.414 |
|                                                  |          |        | 1.104 | 1.019 | 0.916 | 0.979 | 1.025 | 0.791 | 0.932 |
|                                                  |          |        | 0.818 | 0.748 | 0.650 | 0.726 | 0.761 | 0.585 | 0.692 |
|                                                  |          | S2     | 0.248 | 0.344 | 0.473 | 0.373 | 0.326 | 0.557 | 0.417 |
|                                                  |          |        | 1.095 | 1.013 | 0.914 | 0.975 | 1.020 | 0.792 | 0.930 |
|                                                  |          |        | 0.813 | 0.744 | 0.649 | 0.723 | 0.757 | 0.586 | 0.690 |
|                                                  |          | S3     | 0.245 | 0.350 | 0.474 | 0.378 | 0.331 | 0.557 | 0.419 |
|                                                  |          |        | 1.084 | 1.009 | 0.912 | 0.970 | 1.015 | 0.792 | 0.928 |
|                                                  |          |        | 0.804 | 0.740 | 0.648 | 0.719 | 0.754 | 0.586 | 0.689 |
|                                                  | (80,32)  | S1     | 0.248 | 0.299 | 0.380 | 0.315 | 0.290 | 0.433 | 0.350 |
|                                                  |          |        | 1.100 | 0.979 | 0.921 | 0.955 | 0.983 | 0.886 | 0.926 |
|                                                  |          |        | 0.816 | 0.722 | 0.675 | 0.709 | 0.730 | 0.657 | 0.688 |
|                                                  |          | S2     | 0.260 | 0.308 | 0.385 | 0.323 | 0.299 | 0.436 | 0.357 |
|                                                  |          |        | 1.089 | 0.975 | 0.915 | 0.951 | 0.979 | 0.881 | 0.921 |
|                                                  |          |        | 0.807 | 0.719 | 0.671 | 0.706 | 0.727 | 0.653 | 0.684 |
|                                                  |          | S3     | 0.264 | 0.321 | 0.395 | 0.335 | 0.313 | 0.441 | 0.368 |
|                                                  |          |        | 1.096 | 0.970 | 0.911 | 0.947 | 0.974 | 0.878 | 0.916 |
|                                                  |          |        | 0.814 | 0.715 | 0.668 | 0.703 | 0.724 | 0.651 | 0.680 |
|                                                  | (80,64)  | S1     | 0.249 | 0.375 | 0.437 | 0.392 | 0.363 | 0.462 | 0.421 |
|                                                  |          |        | 1.098 | 0.957 | 0.699 | 0.880 | 0.970 | 0.566 | 0.714 |
|                                                  |          |        | 0.815 | 0.692 | 0.475 | 0.652 | 0.720 | 0.419 | 0.529 |
|                                                  |          | S2     | 0.252 | 0.379 | 0.442 | 0.396 | 0.367 | 0.467 | 0.426 |
|                                                  |          |        | 1.088 | 0.948 | 0.691 | 0.874 | 0.961 | 0.562 | 0.704 |
|                                                  |          |        | 0.806 | 0.686 | 0.470 | 0.647 | 0.714 | 0.416 | 0.522 |
|                                                  |          | S3     | 0.250 | 0.383 | 0.446 | 0.400 | 0.372 | 0.470 | 0.430 |
|                                                  |          |        | 1.081 | 0.940 | 0.682 | 0.866 | 0.953 | 0.556 | 0.695 |
|                                                  |          |        | 0.801 | 0.680 | 0.464 | 0.642 | 0.708 | 0.411 | 0.515 |

Table S9: The ACLs ( $1^{st}$  column) and CPs ( $2^{nd}$  column) of ACI/HPD credible intervals of  $\alpha$ .

| $k$<br>Prior $\rightarrow$ | $(n, m)$ | Scheme | ACI   |       | HPD   |       |       |       |
|----------------------------|----------|--------|-------|-------|-------|-------|-------|-------|
|                            |          |        |       |       | 1     |       | 2     |       |
| 2                          | (30,12)  | S1     | 3.278 | 0.922 | 0.464 | 0.938 | 0.293 | 0.951 |
|                            |          | S2     | 3.926 | 0.915 | 0.468 | 0.940 | 0.293 | 0.951 |
|                            |          | S3     | 3.984 | 0.912 | 0.472 | 0.942 | 0.297 | 0.950 |
|                            | (30,24)  | S1     | 1.426 | 0.933 | 0.451 | 0.953 | 0.272 | 0.967 |
|                            |          | S2     | 1.733 | 0.928 | 0.445 | 0.945 | 0.280 | 0.962 |
|                            |          | S3     | 1.889 | 0.925 | 0.453 | 0.947 | 0.275 | 0.965 |
|                            | (80,32)  | S1     | 1.378 | 0.942 | 0.426 | 0.962 | 0.250 | 0.977 |
|                            |          | S2     | 1.151 | 0.946 | 0.439 | 0.956 | 0.255 | 0.976 |
|                            |          | S3     | 1.522 | 0.937 | 0.435 | 0.957 | 0.268 | 0.969 |
|                            | (80,64)  | S1     | 1.035 | 0.956 | 0.242 | 0.970 | 0.198 | 0.984 |
|                            |          | S2     | 1.126 | 0.954 | 0.241 | 0.970 | 0.202 | 0.984 |
|                            |          | S3     | 1.321 | 0.948 | 0.243 | 0.969 | 0.200 | 0.985 |
| 5                          | (30,12)  | S1     | 3.869 | 0.894 | 0.576 | 0.923 | 0.326 | 0.943 |
|                            |          | S2     | 4.045 | 0.888 | 0.583 | 0.919 | 0.324 | 0.942 |
|                            |          | S3     | 4.738 | 0.885 | 0.595 | 0.916 | 0.325 | 0.942 |
|                            | (30,24)  | S1     | 1.896 | 0.907 | 0.499 | 0.939 | 0.288 | 0.954 |
|                            |          | S2     | 2.752 | 0.898 | 0.494 | 0.937 | 0.290 | 0.951 |
|                            |          | S3     | 2.270 | 0.901 | 0.477 | 0.933 | 0.292 | 0.951 |
|                            | (80,32)  | S1     | 1.629 | 0.922 | 0.447 | 0.954 | 0.278 | 0.967 |
|                            |          | S2     | 2.062 | 0.903 | 0.433 | 0.946 | 0.281 | 0.966 |
|                            |          | S3     | 1.942 | 0.914 | 0.444 | 0.954 | 0.287 | 0.964 |
|                            | (80,64)  | S1     | 1.349 | 0.934 | 0.277 | 0.962 | 0.274 | 0.977 |
|                            |          | S2     | 1.488 | 0.926 | 0.279 | 0.962 | 0.273 | 0.977 |
|                            |          | S3     | 1.528 | 0.923 | 0.284 | 0.964 | 0.281 | 0.975 |

Table S10: The ACLs ( $1^{st}$  column) and CPs ( $2^{nd}$  column) of ACI/HPD credible intervals of  $\delta$ .

| $k$<br>Prior $\rightarrow$ | $(n, m)$ | Scheme | ACI   |       | HPD   |       |       |       |
|----------------------------|----------|--------|-------|-------|-------|-------|-------|-------|
|                            |          |        |       |       | 1     |       | 2     |       |
| 2                          | (30,12)  | S1     | 1.418 | 0.932 | 0.444 | 0.964 | 0.422 | 0.970 |
|                            |          | S2     | 1.644 | 0.928 | 0.442 | 0.960 | 0.423 | 0.967 |
|                            |          | S3     | 2.942 | 0.917 | 0.456 | 0.959 | 0.426 | 0.964 |
|                            | (30,24)  | S1     | 1.012 | 0.945 | 0.434 | 0.969 | 0.368 | 0.979 |
|                            |          | S2     | 1.066 | 0.942 | 0.440 | 0.968 | 0.367 | 0.978 |
|                            |          | S3     | 2.331 | 0.928 | 0.439 | 0.965 | 0.365 | 0.976 |
|                            | (80,32)  | S1     | 0.889 | 0.952 | 0.422 | 0.975 | 0.340 | 0.989 |
|                            |          | S2     | 1.001 | 0.950 | 0.435 | 0.973 | 0.332 | 0.985 |
|                            |          | S3     | 1.593 | 0.935 | 0.421 | 0.970 | 0.326 | 0.982 |
|                            | (80,64)  | S1     | 0.673 | 0.968 | 0.333 | 0.983 | 0.184 | 0.991 |
|                            |          | S2     | 0.707 | 0.963 | 0.341 | 0.981 | 0.187 | 0.992 |
|                            |          | S3     | 1.101 | 0.957 | 0.351 | 0.980 | 0.195 | 0.995 |
| 5                          | (30,12)  | S1     | 2.019 | 0.917 | 0.622 | 0.951 | 0.576 | 0.962 |
|                            |          | S2     | 2.395 | 0.914 | 0.634 | 0.950 | 0.581 | 0.962 |
|                            |          | S3     | 4.102 | 0.902 | 0.634 | 0.945 | 0.586 | 0.958 |
|                            | (30,24)  | S1     | 1.445 | 0.930 | 0.612 | 0.955 | 0.438 | 0.966 |
|                            |          | S2     | 1.532 | 0.924 | 0.614 | 0.952 | 0.439 | 0.964 |
|                            |          | S3     | 3.028 | 0.913 | 0.620 | 0.951 | 0.441 | 0.962 |
|                            | (80,32)  | S1     | 1.254 | 0.935 | 0.488 | 0.968 | 0.271 | 0.976 |
|                            |          | S2     | 1.462 | 0.929 | 0.500 | 0.962 | 0.375 | 0.974 |
|                            |          | S3     | 2.204 | 0.920 | 0.508 | 0.967 | 0.371 | 0.972 |
|                            | (80,64)  | S1     | 0.946 | 0.948 | 0.376 | 0.980 | 0.266 | 0.989 |
|                            |          | S2     | 0.993 | 0.944 | 0.381 | 0.975 | 0.267 | 0.987 |
|                            |          | S3     | 1.590 | 0.936 | 0.386 | 0.973 | 0.352 | 0.993 |

Table S11: The ACLs ( $1^{st}$  column) and CPs ( $2^{nd}$  column) of ACI/HPD credible intervals of  $R(t)$ .

| $k$<br>Prior $\rightarrow$ | $(n, m)$ | Scheme | ACI   |       | HPD   |       |       |       |
|----------------------------|----------|--------|-------|-------|-------|-------|-------|-------|
|                            |          |        |       |       | 1     |       | 2     |       |
| 2                          | (30,12)  | S1     | 0.099 | 0.925 | 0.066 | 0.950 | 0.057 | 0.956 |
|                            |          | S2     | 0.090 | 0.930 | 0.065 | 0.951 | 0.056 | 0.955 |
|                            |          | S3     | 0.090 | 0.930 | 0.065 | 0.950 | 0.053 | 0.959 |
|                            | (30,24)  | S1     | 0.071 | 0.941 | 0.059 | 0.962 | 0.050 | 0.970 |
|                            |          | S2     | 0.068 | 0.946 | 0.057 | 0.964 | 0.050 | 0.971 |
|                            |          | S3     | 0.070 | 0.942 | 0.057 | 0.964 | 0.049 | 0.972 |
|                            | (80,32)  | S1     | 0.060 | 0.952 | 0.052 | 0.970 | 0.038 | 0.980 |
|                            |          | S2     | 0.054 | 0.955 | 0.051 | 0.971 | 0.037 | 0.981 |
|                            |          | S3     | 0.056 | 0.954 | 0.051 | 0.970 | 0.036 | 0.982 |
|                            | (80,64)  | S1     | 0.049 | 0.959 | 0.042 | 0.976 | 0.029 | 0.986 |
|                            |          | S2     | 0.049 | 0.959 | 0.041 | 0.978 | 0.029 | 0.987 |
|                            |          | S3     | 0.048 | 0.960 | 0.040 | 0.977 | 0.029 | 0.987 |
| 5                          | (30,12)  | S1     | 0.080 | 0.936 | 0.067 | 0.961 | 0.037 | 0.969 |
|                            |          | S2     | 0.079 | 0.937 | 0.066 | 0.962 | 0.035 | 0.972 |
|                            |          | S3     | 0.078 | 0.938 | 0.066 | 0.962 | 0.037 | 0.973 |
|                            | (30,24)  | S1     | 0.079 | 0.950 | 0.049 | 0.974 | 0.026 | 0.980 |
|                            |          | S2     | 0.078 | 0.952 | 0.049 | 0.973 | 0.025 | 0.985 |
|                            |          | S3     | 0.077 | 0.953 | 0.050 | 0.973 | 0.027 | 0.978 |
|                            | (80,32)  | S1     | 0.064 | 0.957 | 0.040 | 0.980 | 0.022 | 0.985 |
|                            |          | S2     | 0.062 | 0.959 | 0.040 | 0.980 | 0.021 | 0.987 |
|                            |          | S3     | 0.060 | 0.961 | 0.039 | 0.979 | 0.023 | 0.984 |
|                            | (80,64)  | S1     | 0.047 | 0.966 | 0.032 | 0.984 | 0.015 | 0.990 |
|                            |          | S2     | 0.046 | 0.968 | 0.031 | 0.985 | 0.015 | 0.991 |
|                            |          | S3     | 0.046 | 0.968 | 0.030 | 0.986 | 0.016 | 0.990 |

Table S12: The ACLs ( $1^{st}$  column) and CPs ( $2^{nd}$  column) of ACI/HPD credible intervals of  $h(t)$ .

| $k$<br>Prior $\rightarrow$ | $(n, m)$ | Scheme | ACI   |       | HPD   |       |       |       |
|----------------------------|----------|--------|-------|-------|-------|-------|-------|-------|
|                            |          |        |       |       | 1     | 2     |       |       |
| 2                          | (30,12)  | S1     | 1.003 | 0.898 | 0.708 | 0.925 | 0.629 | 0.931 |
|                            |          | S2     | 0.920 | 0.900 | 0.701 | 0.927 | 0.616 | 0.934 |
|                            |          | S3     | 0.882 | 0.906 | 0.698 | 0.930 | 0.610 | 0.938 |
|                            | (30,24)  | S1     | 0.831 | 0.912 | 0.620 | 0.941 | 0.543 | 0.944 |
|                            |          | S2     | 0.828 | 0.927 | 0.610 | 0.938 | 0.543 | 0.943 |
|                            |          | S3     | 0.817 | 0.925 | 0.605 | 0.932 | 0.537 | 0.946 |
|                            | (80,32)  | S1     | 0.670 | 0.923 | 0.566 | 0.950 | 0.528 | 0.957 |
|                            |          | S2     | 0.653 | 0.934 | 0.546 | 0.953 | 0.519 | 0.960 |
|                            |          | S3     | 0.633 | 0.939 | 0.518 | 0.958 | 0.508 | 0.963 |
|                            | (80,64)  | S1     | 0.488 | 0.934 | 0.401 | 0.958 | 0.317 | 0.966 |
|                            |          | S2     | 0.486 | 0.935 | 0.395 | 0.956 | 0.312 | 0.968 |
|                            |          | S3     | 0.480 | 0.938 | 0.383 | 0.952 | 0.307 | 0.971 |
| 5                          | (30,12)  | S1     | 0.839 | 0.907 | 0.704 | 0.930 | 0.368 | 0.949 |
|                            |          | S2     | 0.830 | 0.912 | 0.693 | 0.932 | 0.348 | 0.957 |
|                            |          | S3     | 0.824 | 0.915 | 0.689 | 0.934 | 0.350 | 0.956 |
|                            | (30,24)  | S1     | 0.716 | 0.926 | 0.515 | 0.944 | 0.258 | 0.956 |
|                            |          | S2     | 0.690 | 0.931 | 0.515 | 0.943 | 0.252 | 0.964 |
|                            |          | S3     | 0.693 | 0.929 | 0.518 | 0.941 | 0.261 | 0.950 |
|                            | (80,32)  | S1     | 0.614 | 0.933 | 0.415 | 0.956 | 0.220 | 0.973 |
|                            |          | S2     | 0.553 | 0.940 | 0.416 | 0.955 | 0.206 | 0.974 |
|                            |          | S3     | 0.551 | 0.942 | 0.411 | 0.961 | 0.206 | 0.974 |
|                            | (80,64)  | S1     | 0.432 | 0.948 | 0.328 | 0.967 | 0.151 | 0.983 |
|                            |          | S2     | 0.413 | 0.957 | 0.322 | 0.969 | 0.147 | 0.985 |
|                            |          | S3     | 0.417 | 0.954 | 0.315 | 0.970 | 0.153 | 0.981 |
